# Supplementary material for: Zebrafish Chromosome 14 Gene Differential Expression in the fmr1hu2787 Model of Fragile X Syndrome
Source: PubMed Central journal article supplement (PMC8203322; doi:10.3389/fgene.2021.625466), 2021-05-31
Supplement: Data_Sheet_2.pdf [file Data_Sheet_2.pdf]

## Supplementary Data File 2: Bioinformatics analyses

The code which generated the results in this Supplementary Data File is available at:

[https://github.com/UofABioinformaticsHub/20190129\\_Lardelli\\_FMR1\\_RNASeq](https://github.com/UofABioinformaticsHub/20190129_Lardelli_FMR1_RNASeq)

### Introduction:

Previously, a differential gene expression analysis was performed using limma (Ritchie et al., 2015; Law et al., 2016). However, in our experience, the generalised linear model (GLM) capabilities of edgeR (Robinson et al., 2010; Law et al., 2016) detect more differentially expressed genes.

Prior to count-level analysis, the initial dataset was pre-processed using the following steps:

- Adapters were removed from any reads derived from RNA fragments < 300bp
- Bases were removed from the end of reads when the quality score dipped below 20
- Reads < 35bp after trimming were discarded

After trimming alignment was performed using STAR v2.5.3a to the *Danio rerio* genome included in Ensembl Release 94 (GRCz11). Aligned reads were counted using featureCounts (Liao et al., 2014) for each gene if alignments were unique and overlapped strictly within exonic regions. Undetectable genes (genes which contained less than one counted alignment in at least 4 of the 8 samples) were excluded from the analysis.

### Initial differential gene expression analysis:

We first performed an initial differential gene expression analysis using the generalised linear model functionality of edgeR. EdgeR uses a negative binomial variance function and estimates dispersions using the Cox-Reid profile-adjusted likelihood (CR) method (Robinson et al., 2010). We specified a design matrix with the wild type genotype as the intercept (or baseline) and the effect of homozygosity for the hu2787 allele of *fmr1* as a coefficient (**Table S1**).

| Table S1: Design matrix used in differential expression analysis |             |                                      |
|------------------------------------------------------------------|-------------|--------------------------------------|
|                                                                  | (Intercept) | <i>fmr1</i> <sup>hu2787/hu2787</sup> |
| S2                                                               | 1           | 1                                    |
| S4                                                               | 1           | 1                                    |
| S5                                                               | 1           | 1                                    |
| S8                                                               | 1           | 1                                    |
| A                                                                | 1           | 0                                    |
| D                                                                | 1           | 0                                    |
| G                                                                | 1           | 0                                    |
| L                                                                | 1           | 0                                    |

After dispersions were estimated and the negative binomial model was fitted, likelihood ratio tests were performed to determine which genes were significantly differentially expressed (FDR-adjusted p-value < 0.05) in the *fmr1*<sup>hu2787/hu2787</sup> samples. We identified 14 differentially expressed genes in this

differential expression test and these genes mostly had low/average expression levels ( **Figure S2**). This bias may impact gene set enrichment analysis and should be corrected for, as gene sets with low-medium expressed genes will appear as enriched for being upregulated.

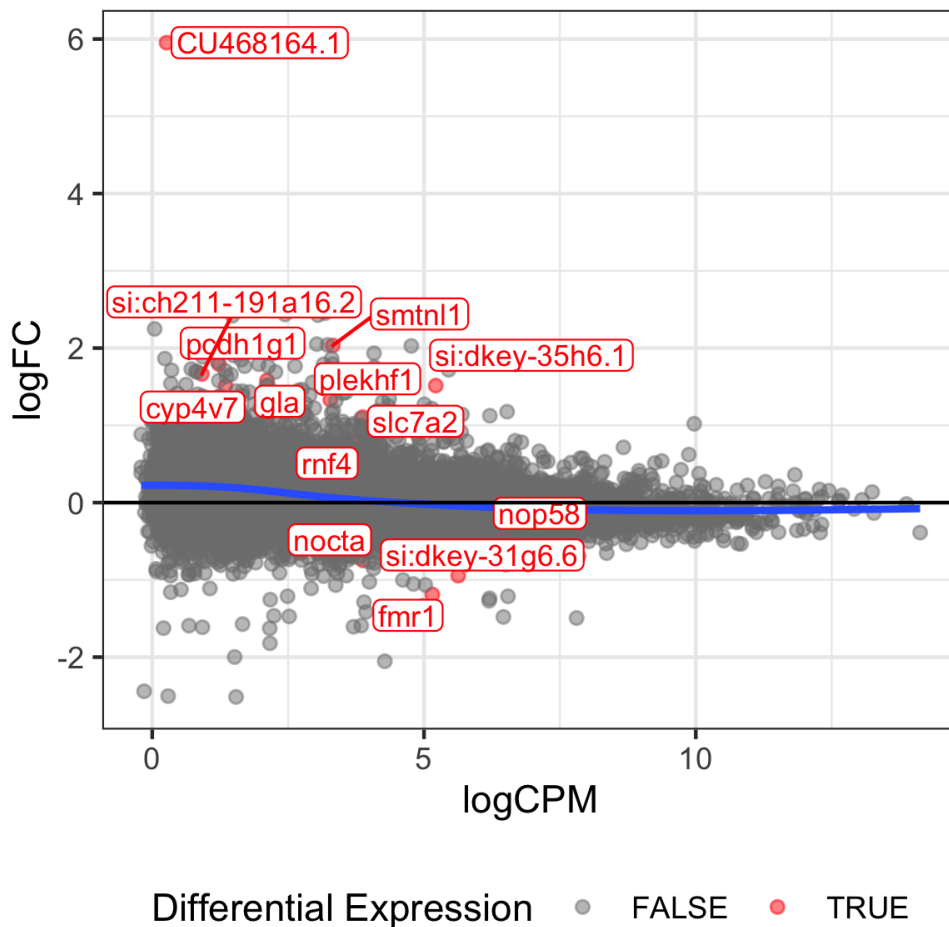

**Figure S2: Mean-difference (MD) plot displaying the average expression level (logCPM) against the log<sub>2</sub> fold change (logFC) of each gene.** Differentially expressed genes are coloured in red. The blue fitted line from a generalised additive model (gam) identified a small bias for lowly expressed genes to be upregulated.

In response to the observed bias, *cqn* (Hansen et al., 2012) was used to rectify this issue as it may be derived from either a length or GC artefact. GC and length information for each gene was obtained from the Ensembl database (GRCz11, release 98). For input to *cqn*, GC content and length were taken as weighted averages and simple averages respectively.

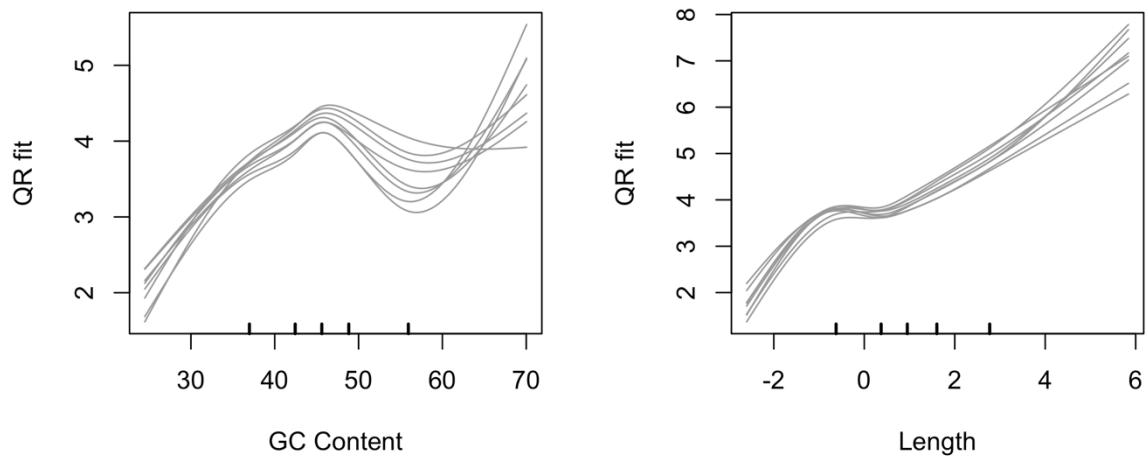

**Figure S3: Model fits for GC content and gene length under the cqnr model.** Variability between samples is clearly visible.

We then performed an additional differential gene expression analysis, including the offset term generated by cqnr when fitting the negative binomial model. The likelihood ratio tests from this model identified 21 differentially expressed genes. Comparison of the MD plots before and after cqnr show that the observed bias was mostly removed, suggesting the gene GC content and length were contributing factors.

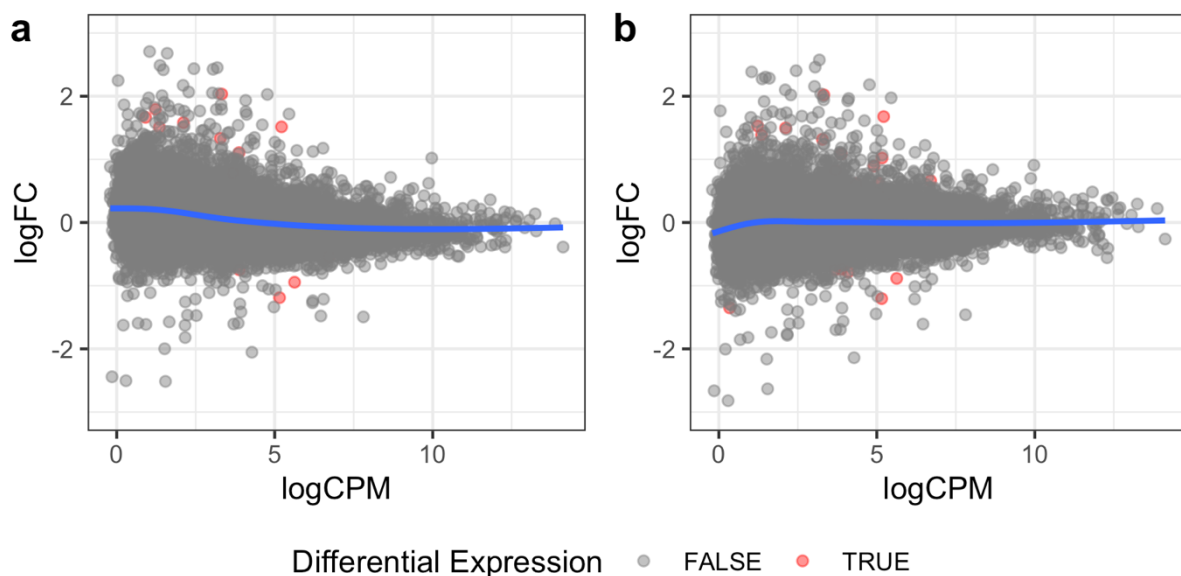

**Figure S4: Comparison of mean difference plots before and after conditional quantile normalisation (cqnr).** The bias evident in a) the pre-cqnr plots is no longer present in b) the post-cqnr plot, suggesting GC and length bias were contributing factors. Blue fit lines are derived from generalised additive models.

We next tested for over-representation of genes based on which chromosome they are located on using goseq (Young et al., 2010). Goseq tests whether there is over-representation of pre-defined gene sets amongst the set of DE genes. It does not take into account the magnitude or direction of

the fold change. However, it can take into account a bias of a gene being classified DE due to its GC content. We found that genes on chromosome 14 were highly over-represented in the DE genes (Table S2).

| Chromosome | Expected | Observed | Gene Set Size | p-value | p <sub>bonferroni</sub> |
|------------|----------|----------|---------------|---------|-------------------------|
| 14         | 0.76     | 12       | 664           | ~0      | ~0                      |
| 6          | 0.94     | 2        | 820           | 0.26    | 1                       |
| 7          | 1.08     | 2        | 942           | 0.33    | 1                       |
| 10         | 0.75     | 1        | 653           | 0.51    | 1                       |
| 17         | 0.81     | 1        | 703           | 0.55    | 1                       |
| 22         | 0.72     | 1        | 629           | 0.56    | 1                       |
| 19         | 0.83     | 1        | 721           | 0.57    | 1                       |
| 4          | 0.80     | 1        | 695           | 0.57    | 1                       |

We next tested for over-representation of the KEGG and HALLMARK gene sets within the DE gene list. We downloaded the KEGG and HALLMARK gene sets from the Molecular Signatures database (MSigDB) as a .gmt file with human gene Entrez identifiers. The human gene Entrez identifiers were converted to zebrafish Ensembl identifiers using a mapping file downloaded from the Ensembl Biomart web server (<https://m.ensembl.org/biomart>). Some genes in the KEGG gene sets did not contain a zebrafish orthologue. Therefore, the gene sets occasionally contained only a small number of genes and this would not be particularly informative. For this reason, only KEGG gene sets which contained > 10 zebrafish genes were retained for analysis.

We identified that the KEGG gene sets for *lysosome* and *glycosphingolipid biosynthesis globo series* were significantly over-represented in the set of DE genes. The HALLMARK gene set for *early estrogen response* approached significance for over-representation. The results from enrichment testing for HALLMARK gene sets within the set of DE genes is found in Table S3 and the results for the KEGG gene sets are found in Table S4.

| HALLMARK Gene Set       | Expected | Observed | Gene Set Size | p-value | p <sub>Bonferroni</sub> |
|-------------------------|----------|----------|---------------|---------|-------------------------|
| ESTROGEN RESPONSE EARLY | 0.19     | 2        | 168           | 0.01    | 0.08                    |
| PROTEIN SECRETION       | 0.11     | 1        | 94            | 0.10    | 0.72                    |
| INFLAMMATORY RESPONSE   | 0.13     | 1        | 116           | 0.13    | 0.90                    |
| HALLMARK COMPLEMENT     | 0.18     | 1        | 155           | 0.16    | 1.00                    |
| ESTROGEN RESPONSE LATE  | 0.19     | 1        | 162           | 0.18    | 1.00                    |
| P53 PATHWAY             | 0.21     | 1        | 183           | 0.19    | 1.00                    |
| MTORC1 SIGNALING        | 0.23     | 1        | 198           | 0.21    | 1.00                    |

**Table S4: Enrichment testing for KEGG gene sets within the set of differentially expressed genes**

| KEGG gene set                                | Expected | Observed | GS Size | p-value | $p_{\text{bonferroni}}$ |
|----------------------------------------------|----------|----------|---------|---------|-------------------------|
| LYSOSOME                                     | 0.13     | 2        | 114     | 0.00    | 0.02                    |
| GLYCOSPHINGOLIPID BIOSYNTHESIS GLOBO SERIES  | 0.01     | 1        | 8       | 0.01    | 0.05                    |
| GALACTOSE METABOLISM                         | 0.02     | 1        | 20      | 0.01    | 0.11                    |
| SPHINGOLIPID METABOLISM                      | 0.04     | 1        | 34      | 0.03    | 0.21                    |
| GLYCEROLIPID METABOLISM                      | 0.04     | 1        | 37      | 0.03    | 0.23                    |
| DRUG METABOLISM CYTOCHROME P450              | 0.04     | 1        | 32      | 0.03    | 0.24                    |
| METABOLISM OF XENOBIOTICS BY CYTOCHROME P450 | 0.04     | 1        | 33      | 0.03    | 0.24                    |
| GLUTATHIONE METABOLISM                       | 0.05     | 1        | 41      | 0.04    | 0.32                    |

Next, we performed gene set enrichment analysis (GSEA) on all detectable genes in the RNA-seq experiment to obtain a more complete view on the changes to gene expression due to *fmr1* genotype. We performed GSEA using the fry (Wu et al., 2010; Ritchie et al., 2015) algorithm from the limma package. Fry approximates the ROAST method, which uses residual space rotation rather than permutations to determine the significance of a gene set showing changes to gene expression (Wu et al., 2010). Using this method, we did not find any significantly altered gene sets (KEGG, HALLMARK or chromosome position) after FDR adjustment of the mixed p-value. The top 10 results are shown in the **Table S5**.

**Table S5: Top 10 most highly ranked gene sets across chromosome position, HALLMARK and KEGG testing using fry. Tests were non-directional (Mixed).**

| Gene set                                                  | Number of genes | p-value | $p_{\text{FDR}}$ |
|-----------------------------------------------------------|-----------------|---------|------------------|
| chromosome 14                                             | 664             | 6.1E-04 | 0.16             |
| KEGG HISTIDINE METABOLISM                                 | 23              | 0.005   | 0.35             |
| HALLMARK MYC TARGETS V2                                   | 57              | 0.006   | 0.35             |
| KEGG VALINE LEUCINE AND ISOLEUCINE DEGRADATION            | 44              | 0.006   | 0.35             |
| KEGG RNA POLYMERASE                                       | 26              | 0.007   | 0.35             |
| KEGG GLYCOSPHINGOLIPID BIOSYNTHESIS GLOBO SERIES          | 8               | 0.008   | 0.35             |
| KEGG GALACTOSE METABOLISM                                 | 20              | 0.009   | 0.35             |
| KEGG GLYCEROLIPID METABOLISM                              | 37              | 0.02    | 0.39             |
| KEGG RNA DEGRADATION                                      | 54              | 0.02    | 0.39             |
| KEGG GLYCOSYLPHOSPHATIDYLINOSITOL GPI ANCHOR BIOSYNTHESIS | 22              | 0.02    | 0.39             |

### Analysis of genes on chromosome 14:

The set of genes located on chromosome 14 was found to be over-represented in the DE list by goseq, and was the gene set identified by fry to contain the most DE genes (**Table S5**), although it did not attain the threshold for significance ( $p < 0.05$ ). We hypothesised that the most differentially expressed genes from chromosome 14 might be enriched in a particular biological pathway which could explain the over-representation detected by goseq (see Table S2 above).

To investigate this, we performed the fast implementation of the GSEA (Subramanian et al., 2005) algorithm, fgsea (Korotkevich et al., 2021), on the gene sets for chromosome position to obtain a list of the “leading edge” genes for chromosome 14. The first step for fgsea is to generate a ranked list of all genes in the experiment. We ranked genes based on the statistical significance of their differential expression (without direction). A visual representation of the ranked list is shown in **Figure S5**.

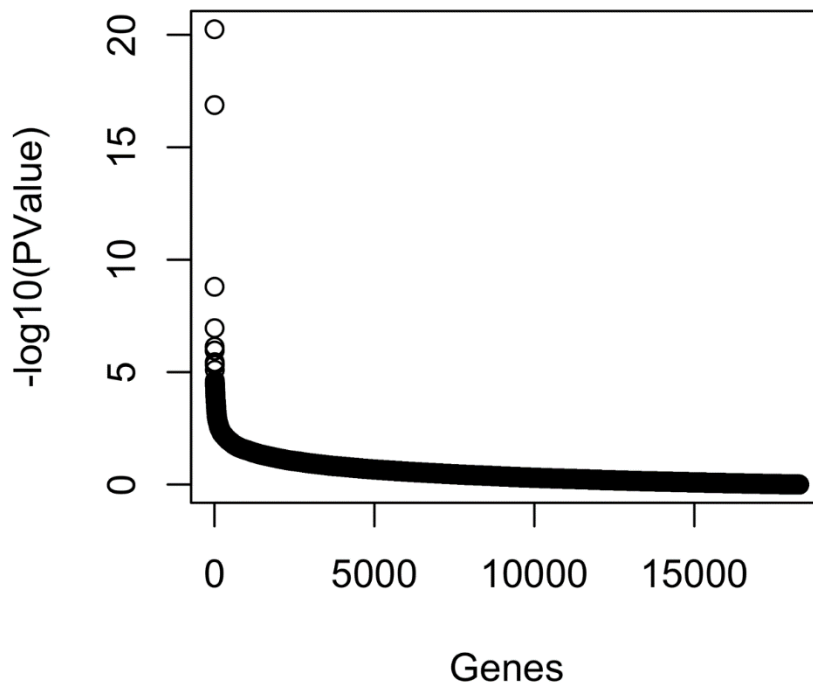

**Figure S5: Visual representation of the ranked list.**

All detectable genes were ranked on the statistical significance of their differential expression, resulting in the most differentially expressed genes at the start of the ranked list (i.e. smallest p-value), and the least differentially expressed genes at the end of the ranked list (largest p-value).

We used this ranked list as input for fgsea, which tests whether there is an enrichment of pre-defined gene sets at either end of the ranked list. We considered a gene set to be enriched if the Bonferroni adjusted p-value was  $< 0.05$ . **Table S6** gives the significantly enriched chromosome position gene sets identified by fgsea.

| Gene set      | p-value | Bonferroni adjusted p-value | Enrichment score | Normalised enrichment score | Gene set size |
|---------------|---------|-----------------------------|------------------|-----------------------------|---------------|
| Chromosome 14 | 1e-5    | 0.00026                     | 0.53             | 1.398                       | 664           |
| Chromosome 22 | 2e-5    | 0.00052                     | 0.46             | 1.2                         | 629           |

The leading edge genes for each gene set from the fgsea algorithm are the most highly ranked genes of a gene set in the ranked list and contribute most to its enrichment. **Figure S6** shows the enrichment plots of genes found on chromosomes 14 and 22 relative to the ranked list. The leading edge genes are the genes which are positioned in the ranked list before the peak of the enrichment score.

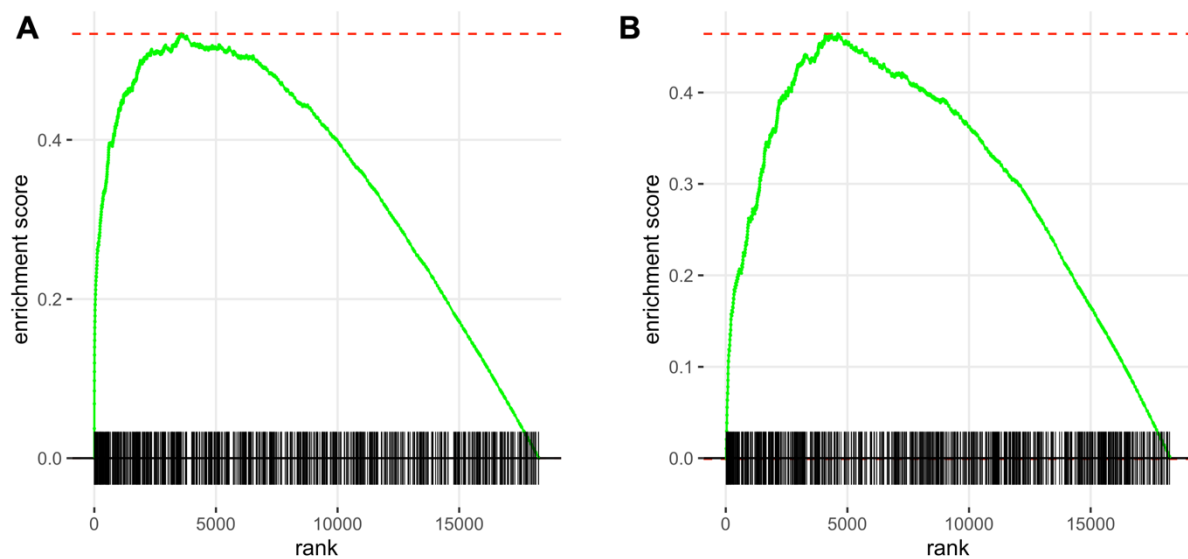

**Figure S6: Enrichment plot of genes from chromosome 14 and 22.**

The x-axis shows the ranked list of genes, with black bars indicating a gene from **A)** chromosome 14 and **B)** chromosome 22, and missing bars indicating a gene not from either chromosome. The y-axis gives the enrichment score, with the green line indicating the running enrichment score along the ranked list. The genes located before the peak are the leading edge subset.

To determine whether the leading edge subset of genes from chromosome 14 are enriched in any biological pathways, we performed over-representation analysis on the chromosome 14 leading edge against all detectable genes in the RNA-seq experiment. We found that the KEGG gene sets for *RNA polymerase* and *neuroactive ligand receptor interactions* were found to be significantly enriched after correction for multiple testing by FDR, but not by the more stringent Bonferroni method (**Table S7**).

**Table S7: Top 7 KEGG gene sets found to be over-represented in the chromosome 14 leading edge relative to all genes detected in the RNA-seq experiment.**

| Gene set                                       | p-value | p <sub>FDR</sub> | p <sub>bonf</sub> | No. genes in leading edge | No. genes in gene set |
|------------------------------------------------|---------|------------------|-------------------|---------------------------|-----------------------|
| RNA POLYMERASE                                 | 0.00303 | 0.043            | 0.061             | 3                         | 26                    |
| NEUROACTIVE LIGAND RECEPTOR INTERACTION        | 0.0043  | 0.043            | 0.086             | 6                         | 135                   |
| AMYOTROPHIC LATERAL SCLEROSIS ALS              | 0.0188  | 0.0942           | 0.375             | 3                         | 50                    |
| GLYCOSAMINOGLYCAN BIOSYNTHESIS HEPARAN SULFATE | 0.0274  | 0.0942           | 0.547             | 2                         | 23                    |
| LONG TERM POTENTIATION                         | 0.038   | 0.0942           | 0.769             | 3                         | 66                    |
| LYSOSOME                                       | 0.0401  | 0.0942           | 0.802             | 4                         | 114                   |
| APOPTOSIS                                      | 0.041   | 0.0942           | 0.829             | 3                         | 68                    |



# A NEUROACTIVE LIGAND-RECEPTOR INTERACTION

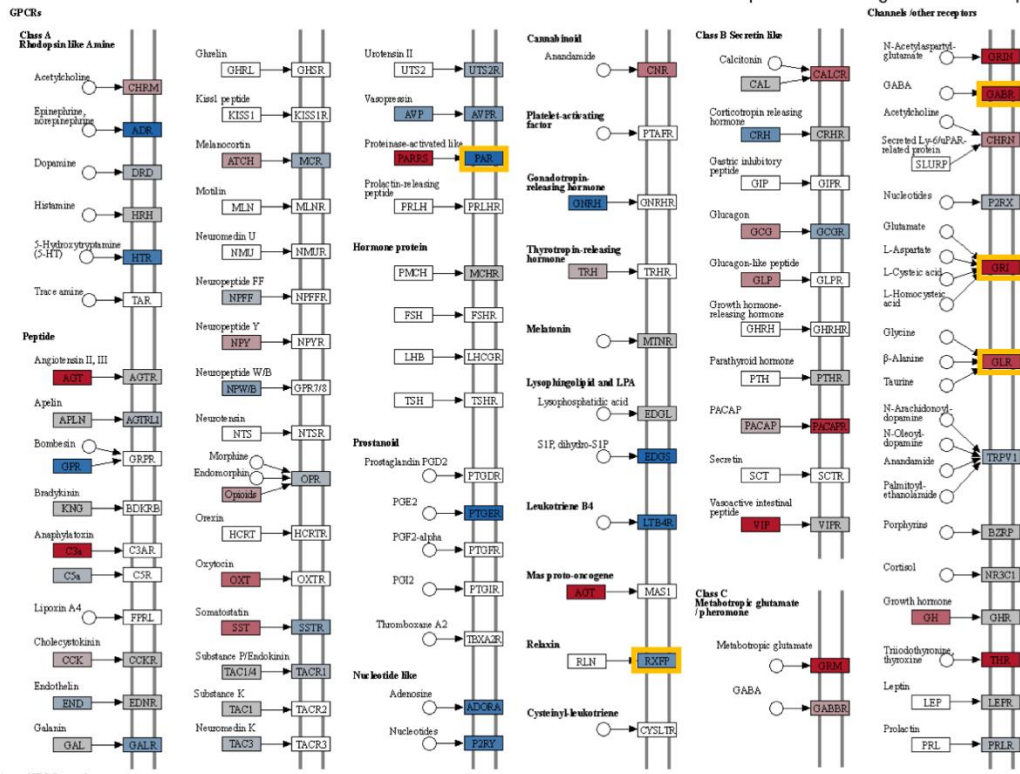

# B RNA POLYMERASE

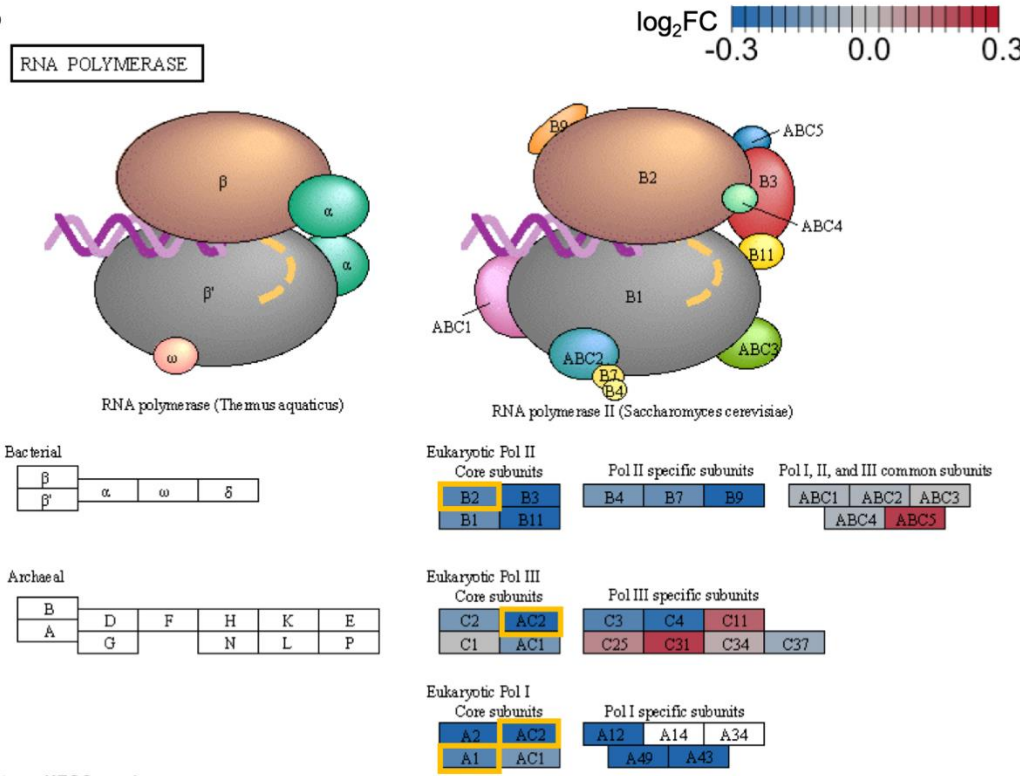

**Figure S7: Pathview visualisation of changes to gene expression in neuroactive ligand receptor interactions and the RNA polymerase complex.**

The Kyoto Encyclopedia of Genes and Genomes, KEGG, pathways for **A**, *neuroactive ligand receptor interactions* and **B**, *RNA polymerase*, with the intensity of the colour representing the  $\log_2FC$  of each gene. Genes which are present in the leading edge of chromosome 14 are indicated with the orange boxes. Plots are adapted from Pathview (Luo and Brouwer, 2013) and displayed with permission of KEGG, (Kanehisa and Goto, 2000).

As an alternative viewpoint, we performed over-representation analysis on the chromosome 14 leading edge subset against all genes on chromosome 14. No significant over-representation was found (**Table S8**). However, all three genes from the *ALS* and *long term potentiation* gene sets which are found on chromosome 14 are present in the leading edge subset, suggesting a possible co-regulatory mechanism.

| <b>Table S8: Top 7 KEGG gene sets found to be over-represented in the chromosome 14 leading edge relative to all genes on chromosome 14.</b> |         |                  |                   |                           |                                  |
|----------------------------------------------------------------------------------------------------------------------------------------------|---------|------------------|-------------------|---------------------------|----------------------------------|
| Gene set                                                                                                                                     | p-value | p <sub>FDR</sub> | p <sub>bonf</sub> | No. genes in leading edge | No. genes in gene set on chr 14. |
| AMYOTROPHIC LATERAL SCLEROSIS ALS                                                                                                            | 0.0296  | 0.16             | 0.591             | 3                         | 3                                |
| LONG TERM POTENTIATION                                                                                                                       | 0.0296  | 0.16             | 0.591             | 3                         | 3                                |
| ALZHEIMERS DISEASE                                                                                                                           | 0.0343  | 0.16             | 0.696             | 4                         | 5                                |
| FOCALADHESION                                                                                                                                | 0.0274  | 0.16             | 1                 | 4                         | 6                                |
| NEUROACTIVE LIGAND RECEPTOR INTERACTION                                                                                                      | 0.038   | 0.16             | 1                 | 6                         | 11                               |
| APOPTOSIS                                                                                                                                    | 0.0401  | 0.16             | 1                 | 3                         | 4                                |
| RNA POLYMERASE                                                                                                                               | 0.041   | 0.16             | 1                 | 3                         | 4                                |

**Testing the influence of w2 (*nacre*) mutation contamination**

Some of the parents used to generate the clutches of larvae in this experiment were heterozygous for the *w2* allele of *melanocyte inducing transcription factor a* (*mitfa*), a C to T point mutation which results in a premature stop codon in exon 3 of *miffta* (Lister et al., 1999). (Apparently this allele was present in the original stock of *fmr1<sup>hu2787</sup>* fish we imported into Australia.)

We first assessed the proportion of reads which aligned to the *w2* allele of *mitfa* relative to the wild type allele to estimate the proportion of parents who carried the *w2* allele. Sample “D” and “S5” had relatively high proportions of *w2*-aligned reads. Samples S2, S4 and S8 had relatively low proportions of *w2*-aligned reads. Samples A, G and L had no reads aligned to the *w2* allele. Exploratory analysis between the proportion of reads aligning to the *w2* allele and the first four principal components of the dataset (which capture approximately 85% of the total variability) did not identify any strong correlations.

To determine whether the proportion of *w2* reads affects the results of a differential gene expression test, we used the proportion of *w2* reads as a blocking variable (as a categorical factor, with no, low and high *w2* contamination as the levels) in a limma voom analysis with the *duplicateCorrelation* function. A comparison between a ranking statistic ( $\text{sign}(\log FC) \times -\log_{10}(p-$

value)) showed marginal changes to the results of the DE analysis. Therefore, the presence of the *w2* allele in *mitfa* likely has minimal effects on DE analysis and can be ignored (**Figure S8**).

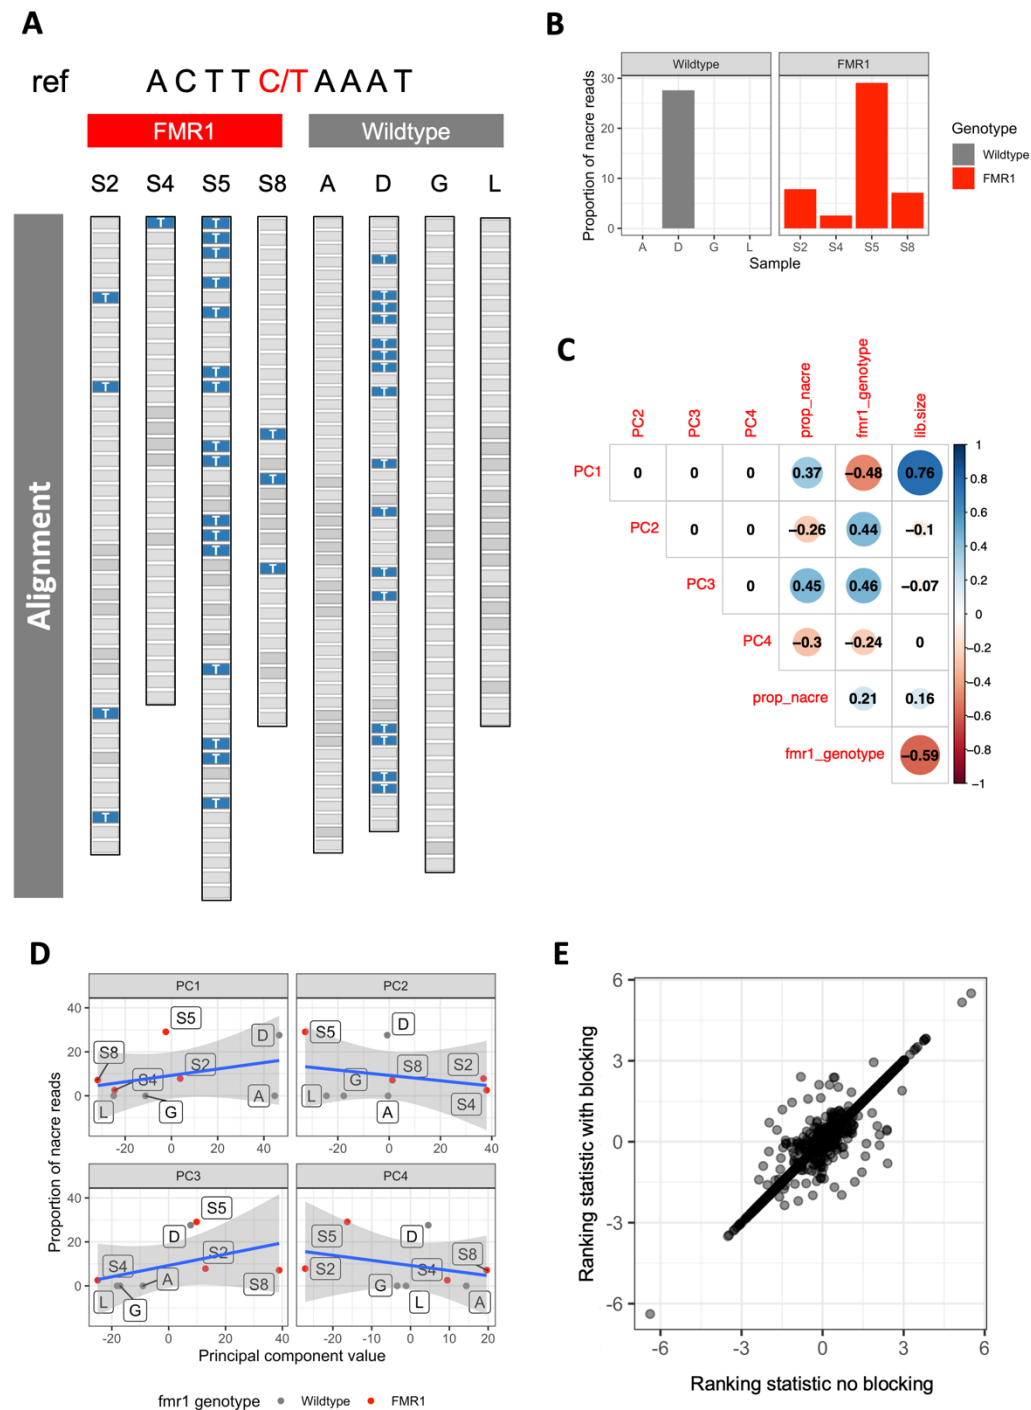

**Figure S8: Presence of the *w2* allele of *mitfa* does not greatly affect the transcriptomes of pooled *fmr1*<sup>-/-</sup> larvae.**

**A)** Alignment of reads to the *w2* site of melanocyte inducing transcription factor a (*mitfa*, on chromosome 6, position 43429185 according to the GRCz11 build of the zebrafish genome). **B)** Percentage of reads aligning to the *w2* site for each sample. **C)** Pearson correlations between the first four principal components of the conditional-quantile normalised expression values for each gene, and the proportion of reads aligning to the *w2* site (*prop\_nacre*), *fmr1* genotype, and RNA-seq

library size (lib.size). **D)** Proportion of  $w_2$  (nacre) reads shown against the first four principal component values. Minimal correlation is observed. However, the standard errors (grey) for the regression lines in blue are large, suggesting that the effect is not highly significant. **E)** Scatterplot showing a ranking statistic ( $\text{sign}(\log\text{FC}) * -\log_{10}(\text{p-value})$ ) for each gene with and without using the proportion of  $w_2$  reads as a blocking variable in a limma voom analysis. The most highly ranked genes (i.e. the most differentially expressed) do not change when including the proportion of  $w_2$  reads in the model.

## References

- Hansen, K.D., Irizarry, R.A., and Wu, Z. (2012). Removing technical variability in RNA-seq data using conditional quantile normalization. *Biostatistics* 13, 204-216.
- Kanehisa, M., and Goto, S. (2000). KEGG: kyoto encyclopedia of genes and genomes. *Nucleic Acids Res* 28, 27-30.
- Korotkevich, G., Sukhov, V., Budin, N., Shpak, B., Artyomov, M.N., and Sergushichev, A. (2021). Fast gene set enrichment analysis. *bioRxiv*, 060012.
- Law, C.W., Alhamdoosh, M., Su, S., Dong, X., Tian, L., Smyth, G.K., and Ritchie, M.E. (2016). RNA-seq analysis is easy as 1-2-3 with limma, Glimma and edgeR. *F1000Res* 5.
- Liao, Y., Smyth, G.K., and Shi, W. (2014). featureCounts: an efficient general purpose program for assigning sequence reads to genomic features. *Bioinformatics* 30, 923-930.
- Lister, J.A., Robertson, C.P., Lepage, T., Johnson, S.L., and Raible, D.W. (1999). nacre encodes a zebrafish microphthalmia-related protein that regulates neural-crest-derived pigment cell fate. *Development* 126, 3757-3767.
- Luo, W., and Brouwer, C. (2013). Pathview: an R/Bioconductor package for pathway-based data integration and visualization. *Bioinformatics* 29, 1830-1831.
- Ritchie, M.E., Phipson, B., Wu, D., Hu, Y., Law, C.W., Shi, W., and Smyth, G.K. (2015). limma powers differential expression analyses for RNA-sequencing and microarray studies. *Nucleic Acids Res* 43, e47.
- Robinson, M.D., McCarthy, D.J., and Smyth, G.K. (2010). edgeR: a Bioconductor package for differential expression analysis of digital gene expression data. *Bioinformatics* 26, 139-140.
- Subramanian, A., Tamayo, P., Mootha, V.K., Mukherjee, S., Ebert, B.L., Gillette, M.A., Paulovich, A., Pomeroy, S.L., Golub, T.R., Lander, E.S., and Mesirov, J.P. (2005). Gene set enrichment analysis: a knowledge-based approach for interpreting genome-wide expression profiles. *Proc Natl Acad Sci US A* 102, 15545-15550.
- Wu, D., Lim, E., Vaillant, F., Asselin-Labat, M.L., Visvader, J.E., and Smyth, G.K. (2010). ROAST: rotation gene set tests for complex microarray experiments. *Bioinformatics* 26, 2176-2182.
- Young, M.D., Wakefield, M.J., Smyth, G.K., and Oshlack, A. (2010). Gene ontology analysis for RNA-seq: accounting for selection bias. *Genome Biol* 11, R14.
