# Supplementary material for: Zebrafish Chromosome 14 Gene Differential Expression in the fmr1hu2787 Model of Fragile X Syndrome
Source: PubMed Central journal article supplement (PMC8203322; doi:10.3389/fgene.2021.625466), 2021-05-31
Supplement: Data_Sheet_5.pdf [file Data_Sheet_5.pdf]

## Supplementary Data File 5: Zebrafish transcripts with sequence homology to *fmr1*

The Ensembl BLAST server ([http://asia.ensembl.org/Danio\\_rerio/Tools/Blast](http://asia.ensembl.org/Danio_rerio/Tools/Blast)) was used to search all sequences across the zebrafish genome and transcriptome (Ensembl version 101), with parameters set for distant homology to the cDNA sequence of *fmr1* (ENSDART00000123434.3). Only results with an E-value < 1 were retained.

The BLAST results for *fmr1* are summarised in **Table S11**.

| <b>Table S11: Summary of BLAST matches for <i>fmr1</i></b> |                                                                     |                      |                      |
|------------------------------------------------------------|---------------------------------------------------------------------|----------------------|----------------------|
| <b>BLAST Hit</b>                                           | <b>Description</b>                                                  | <b>Total Matches</b> | <b>Longest Match</b> |
| fxr1                                                       | fragile X mental retardation, autosomal homolog 1                   | 10                   | 1359                 |
| fxr2                                                       | fragile X mental retardation, autosomal homolog 2                   | 16                   | 977                  |
| nr2f6a                                                     | nuclear receptor subfamily 2, group F, member 6a                    | 1                    | 75                   |
| ZBTB26                                                     | zinc finger and BTB domain containing 26                            | 1                    | 72                   |
| nat10                                                      | N-acetyltransferase 10                                              | 1                    | 46                   |
| rybpa                                                      | RING1 and YY1 binding protein a                                     | 1                    | 43                   |
| ctdnep1b                                                   | CTD nuclear envelope phosphatase 1b                                 | 1                    | 38                   |
| gnb1b                                                      | guanine nucleotide binding protein (G protein), beta polypeptide 1b | 1                    | 35                   |
| acvr2aa                                                    | activin A receptor type 2Aa                                         | 1                    | 34                   |
| ube2d2                                                     | ubiquitin-conjugating enzyme E2D 2 (UBC4/5 homolog, yeast)          | 1                    | 31                   |

An exploration of the relationship between sequence similarity and upregulation, based on several similarity thresholds, revealed no significant correlation (**Figure S9**).

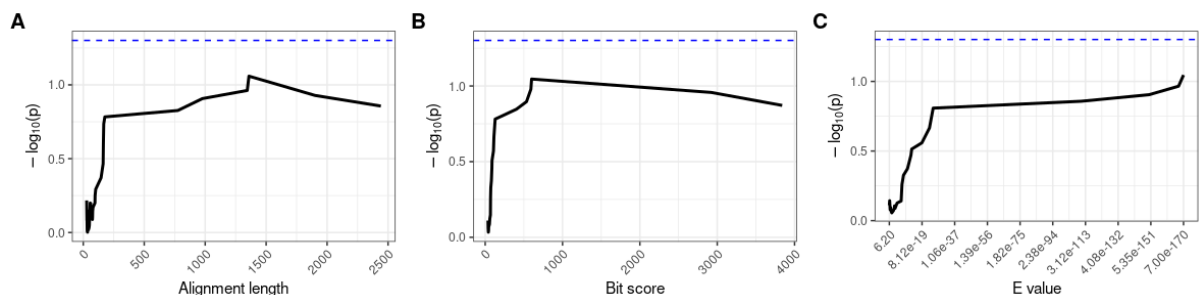

**Figure S11: Impact of various thresholds of three different alignment-quality parameters of BLASTn on the significance of the observed correlation between upregulation and sequence similarity.** The y-axis of each diagram shows the negative  $\log_{10} p$ -value and the x-axis shows the respective alignment-quality parameter. A  $p$ -value of 0.05 is represented as a horizontal dashed blue line in each diagram.  $p$ -values were calculated by bootstrapping random subsamples (see El-Brolsy et al. (El-Brolsy et al., 2019) methods section ‘Sequence similarity and subsampling analyses’) and

were not adjusted for multiple testing. **A)** Alignment length describes the length of sequence satisfying similarity criteria of BLASTn. **B)** Bit score is a value that represents how good an alignment is based on alignment quality and length. **C)** E value describes the probability of a match resulting from chance.

Although not the subject of investigation, two of the genes detected as differentially expressed (*smtnl1* and *CU468164.1*) were analysed using BLAST as a reverse viewpoint on the experiment. Neither of the genes contained matches to *fmr1* (Tables S12, S13).

| <b>Table S12: Summary of BLAST matches for <i>smtnl1</i></b> |                                                                                      |                      |                      |
|--------------------------------------------------------------|--------------------------------------------------------------------------------------|----------------------|----------------------|
| <b>BLAST Hit</b>                                             | <b>Description</b>                                                                   | <b>Total Matches</b> | <b>Longest Match</b> |
| smtna                                                        | smoothelin a                                                                         | 1                    | 297                  |
| smtnb                                                        | smoothelin b                                                                         | 4                    | 258                  |
| si:ch211-195o20.7                                            | si:ch211-195o20.7                                                                    | 1                    | 173                  |
| CU929178.1                                                   | NUL                                                                                  | 1                    | 134                  |
| nefla                                                        | neurofilament, light polypeptide a                                                   | 3                    | 132                  |
| psd2                                                         | pleckstrin and Sec7 domain containing 2                                              | 1                    | 92                   |
| si:dkey-20i20.10                                             | si:dkey-20i20.10                                                                     | 1                    | 88                   |
| taf3                                                         | TAF3 RNA polymerase II, TATA box binding protein (TBP)-associated facto              | 2                    | 84                   |
| tgfbr2a                                                      | transforming growth factor beta receptor 2a                                          | 1                    | 78                   |
| ppp1r37                                                      | protein phosphatase 1, regulatory subunit 37                                         | 1                    | 76                   |
| brd3b                                                        | bromodomain containing 3b                                                            | 3                    | 63                   |
| cmya5                                                        | cardiomyopathy associated 5                                                          | 2                    | 61                   |
| chd5                                                         | chromodomain helicase DNA binding protein 5                                          | 1                    | 60                   |
| chd2                                                         | chromodomain helicase DNA binding protein 2                                          | 2                    | 58                   |
| zgc:175284                                                   | zgc:175284                                                                           | 2                    | 54                   |
| zgc:173726                                                   | zgc:173726                                                                           | 6                    | 52                   |
| map6a                                                        | microtubule-associated protein 6a                                                    | 2                    | 52                   |
| si:dkey-20i20.9                                              | si:dkey-20i20.9                                                                      | 1                    | 52                   |
| znf1170                                                      | zinc finger protein 1170                                                             | 1                    | 52                   |
| stab2                                                        | stabilin 2                                                                           | 4                    | 51                   |
| znf1166                                                      | zinc finger protein 1166                                                             | 3                    | 51                   |
| igfn1.1                                                      | immunoglobulin-like and fibronectin type III domain containing 1, tandem duplicate 1 | 1                    | 49                   |
| zswim8                                                       | zinc finger, SWIM-type containing 8                                                  | 4                    | 47                   |
| kcnma1a                                                      | potassium large conductance calcium-activated channel, subfamily M, alpha member 1a  | 3                    | 44                   |
| gpbp1l1                                                      | GC-rich promoter binding protein 1-like 1                                            | 2                    | 44                   |
| foxn2b                                                       | forkhead box N2b                                                                     | 1                    | 43                   |

|            |                                                  |   |    |
|------------|--------------------------------------------------|---|----|
| polr2f     | polymerase (RNA) II (DNA directed) polypeptide F | 1 | 42 |
| lmod1a     | leiomodins 1a (smooth muscle)                    | 1 | 41 |
| nktr       | natural killer cell triggering receptor          | 1 | 41 |
| im:7152348 | im:7152348                                       | 1 | 39 |
| jak2b      | Janus kinase 2b                                  | 1 | 35 |
| nop58      | NOP58 ribonucleoprotein homolog (yeast)          | 1 | 35 |
| zfr2       | zinc finger RNA binding protein 2                | 2 | 29 |
| chd3       | chromodomain helicase DNA binding protein 3      | 3 | 23 |

**Table S13: Summary of BLAST matches for CU468164.1**

| BLAST Hit         | Description                                         | Total Matches | Longest Match |
|-------------------|-----------------------------------------------------|---------------|---------------|
| si:ch211-262h13.3 | si:ch211-262h13.3                                   | 5             | 268           |
| si:ch211-244k5.1  | si:ch211-244k5.1                                    | 1             | 267           |
| si:dkey-242h9.3   | si:dkey-242h9.3                                     | 1             | 70            |
| or117-1           | odorant receptor, family F, subfamily 117, member 1 | 1             | 53            |
| cib1              | calcium and integrin binding 1 (calmyrin)           | 2             | 39            |
| im:7147486        | im:7147486                                          | 2             | 35            |
| ppp1r18           | protein phosphatase 1, regulatory subunit 18        | 1             | 35            |

**Conclusion:**

No clear evidence was found for transcriptional adaptation in this dataset.

Alternative strategies were investigated briefly using pair-wise alignments between two other genes identified to be differentially expressed, but no compelling evidence was found.

**Reference:**

El-Brolosy, M.A., Kontarakis, Z., Rossi, A., Kuenne, C., Gunther, S., Fukuda, N., Kikhi, K., Boezio, G.L.M., Takacs, C.M., Lai, S.L., Fukuda, R., Gerri, C., Giraldez, A.J., and Stainier, D.Y.R. (2019). Genetic compensation triggered by mutant mRNA degradation. *Nature* 568, 193-197.
